# 1 **Is *Anopheles gambiae* a natural host of *Wolbachia*?**

2

3 Ewa Chrostek<sup>1,2\*</sup> and Michael Gerth<sup>2\*</sup>

4 1. Max Planck Institute for Infection Biology, Berlin, Germany

5 2. Institute of Integrative Biology, University of Liverpool, United Kingdom

6 \* Correspondence to: [echrostek@gmail.com](mailto:echrostek@gmail.com) and [gerth@liverpool.ac.uk](mailto:gerth@liverpool.ac.uk)

7

## 8 **Abstract**

9 *Wolbachia* (Alphaproteobacteria, Rickettsiales) is an intraovarially-transmitted symbiont of  
10 insects able to exert striking phenotypes, including reproductive manipulations and pathogen  
11 blocking. These phenotypes make *Wolbachia* a promising tool to combat mosquito-borne diseases.  
12 Although *Wolbachia* is present in the majority of terrestrial arthropods, including many disease  
13 vectors, it was considered absent from *Anopheles gambiae* mosquitos, the main vectors of malaria  
14 in sub-Saharan Africa. In 2014, *Wolbachia* sequences were detected in *A. gambiae* samples  
15 collected in Burkina Faso. Subsequently, similar evidence came from collections all over Africa,  
16 revealing a high *Wolbachia* 16S sequence diversity, low abundance, and a lack of congruence  
17 between host and symbiont phylogenies. Here, we reanalyze and discuss recent evidence on the  
18 presence of *Wolbachia* sequences in *A. gambiae*. We find that although detected at increasing  
19 frequencies, the unusual properties of these *Wolbachia* sequences render them insufficient to  
20 diagnose natural infections in *A. gambiae*. Future studies should focus on uncovering the origin of  
21 *Wolbachia* sequence variants in *Anopheles* and seeking sequence-independent evidence for this  
22 new symbiosis. Understanding the ecology of *Anopheles* mosquitos and their interactions with  
23 *Wolbachia* will be key in designing successful, integrative approaches to limit malaria spread.

24 Although the prospect of using *Wolbachia* to fight malaria is intriguing, the newly discovered  
25 strains do not bring it closer to realization.

26

## 27 **Significance**

28 *Anopheles gambiae* mosquitos are the main vectors of malaria, threatening around half of the  
29 world's population. The bacterial symbiont *Wolbachia* can interfere with disease transmission by  
30 other important insect vectors, but until recently it was thought to be absent from natural *A.*  
31 *gambiae* populations. Here, we critically analyze the genomic, metagenomic, PCR, imaging and  
32 phenotypic data presented in support of the presence of natural *Wolbachia* infections in *A.*  
33 *gambiae*. We find that they are insufficient to diagnose *Wolbachia* infections and argue for the  
34 need of obtaining robust data confirming basic *Wolbachia* characteristics in this system.  
35 Determining *Wolbachia* infection status of *Anopheles* is critical due to its potential to influence  
36 *Anopheles* population structure and *Plasmodium* transmission.

37

## 38 **Introduction**

39 *Wolbachia* is an obligate intracellular, intraovarially-transmitted bacterium living in symbiosis  
40 with many invertebrates (1). Depending on host and symbiont genotypes, and environmental  
41 conditions, *Wolbachia* has been shown to either affect the biology of its hosts in striking ways or  
42 exert only mild phenotypes. Some of the conspicuous *Wolbachia* phenotypes include reproductive  
43 manipulations, where maternally inherited symbionts favor survival and reproduction of  
44 transmitting females over non-infected females and non-transmitting males (2). One of the  
45 reproductive manipulations, cytoplasmic incompatibility (CI) (3), has been proposed as a tool to  
46 suppress mosquito populations and decrease arbovirus burden on humans (4, 5). Bidirectional CI  
47 - the inability of females to produce offspring with males harboring a different *Wolbachia* strain -

48 has been successful in eliminating the filariasis vector, *Culex pipiens fatigans* from Okpo,  
49 Myanmar in 1967 (5), and suppressing *Aedes albopictus*, vector of dengue, Zika and West Nile  
50 virus, in trials in Lexington, Kentucky, California, and New York, USA  
51 (<https://mosquitomate.com>).

52 *Wolbachia* can also provide infected individuals with fitness benefits: nutrient provisioning (6),  
53 increase in reproductive output (7), and protection against pathogens (8, 9). The latter is also being  
54 used to eliminate vector-borne diseases. *Aedes aegypti* mosquitos artificially transinfected with  
55 protective *Wolbachia* are being deployed as a strategy to eradicate dengue virus (10–15). The data  
56 from one of the first release sites in Australia suggest that this strategy may limit the number of  
57 dengue cases in humans (15).

58 Malaria is a mosquito-borne disease that threatens around half of the world's population (16). The  
59 potential for the use of *Wolbachia* to block malaria has been recognized since the symbiont's anti-  
60 viral and anti-parasitic properties were first demonstrated in other insects (8–10, 17). However,  
61 *Anopheles* mosquitos were for long considered inhospitable for *Wolbachia* (18–20). This has  
62 started to change in 2006, when *Wolbachia* infections in *Anopheles* cultured cells were established  
63 for the first time (21). Next, transient somatic infections were created by intrathoracic inoculation  
64 of virulent wMelPop *Wolbachia* into adult mosquitos (22). In somatic transinfections, *Wolbachia*  
65 does not infect the germline (23), which is necessary for its maternal transmission and pathogen  
66 blocking-based field applications. Therefore, a successful generation of stable *Wolbachia*  
67 infections in *Anopheles stephensi* by Bian *et al.* was a big step towards field applications (24).  
68 Subsequently, gut microbiota of *A. stephensi* and *A. gambiae* was shown to hinder establishment  
69 of heritable *Wolbachia* infections in these species, and curing *Anopheles* of its microbiota enabled  
70 *Wolbachia* persistence (25). In 2014, the first evidence for natural *Wolbachia* infections was found  
71 in *Anopheles gambiae* and *Anopheles coluzzii* (two sibling mosquitos species of *Anopheles*

72 *gambiae* species complex, considered the main malaria vectors in Sub-Saharan Africa – see  
73 Supplementary File 1 for details) from Burkina Faso (26). This was striking, as the natural  
74 *Wolbachia* phenotypes could change mosquito biology, population structure and, as such, affect  
75 malaria transmission. Several similar reports identifying *Wolbachia* sequences in *A. gambiae*  
76 populations across Africa have shortly followed (27–31).  
77 Here, we examine the evidence on natural *Wolbachia* infections in *Anopheles gambiae* mosquitos  
78 and screen 1000 *Anopheles* genomes (Ag1000G) project data (32) to reveal that *Wolbachia* reads  
79 are extremely rare in this rich and randomized dataset. We re-analyze the data from which a  
80 genome of the putative *Wolbachia* endosymbiont of *Anopheles gambiae* was assembled (33) to  
81 show that the majority of reads in the sample originate from known *Wolbachia* hosts different than  
82 *Anopheles gambiae*. Finally, we discuss the requirements to diagnose a *Wolbachia* infections in a  
83 species previously considered uninfected, the potential ecological interactions which could lead to  
84 the observed *Wolbachia* sequence prevalence patterns, and their relevance for the design of  
85 successful, integrative approaches to limit malaria spread.

86

### 87 **Molecular evidence for natural *Wolbachia* in *Anopheles gambiae***

88 The first evidence of natural *Wolbachia* infections in malaria vectors comes from a study on field  
89 collected samples of *Anopheles gambiae* from Burkina Faso (26), in which *Wolbachia* sequences  
90 were detected through 16S V4 amplicon sequencing and a *Wolbachia*-specific PCR targeting the  
91 438 bp ‘wSpec’ region of the 16S rDNA sequence (34). Furthermore, whole genome shotgun  
92 sequencing of two ovarian samples was performed. Out of over 164.6 million high quality  
93 *Anopheles*-depleted sequences obtained from two Illumina HiSeq lanes, 571 reads mapped to  
94 *Wolbachia* genomes, corresponding to a *Wolbachia* genome coverage of ~0.05x. Overall, out of  
95 an average of over 1000 *Wolbachia* genes, only 134 had at least one read assigned to them.  
96 Moreover, 76 of the 571 reads mapped to *Wolbachia* transposases (26). This demonstrates that the

97 *Wolbachia* sequences in these samples were of extremely low titer - the ratio of *Wolbachia* to host  
98 coverage was ~1:4700. For comparison, in various *Drosophila melanogaster* sequencing projects,  
99 observed ratios ranged from 27:1 to 1:5 (35). The data described above represent the only genomic  
100 evidence for the presence of *Wolbachia* in *A. gambiae*.

101 To identify additional *Wolbachia* sequences in *A. gambiae*, we screened data generated in the  
102 Ag1000G project, which investigates genetic variance and population biology of *A. gambiae*  
103 (<https://www.malariagen.net>). We used the data released in the course of ‘phase 1 AR3’, namely  
104 Illumina sequences of 765 wild caught mosquitos from eight African countries (32). Reads for all  
105 samples were downloaded from the European Nucleotide Archive (ENA), and mapped to  
106 *Wolbachia* reference genomes. Using the criteria of Baldini *et al.* 2014 (26) (see Supplementary  
107 File 1 for details), we identified 446 reads from 96 libraries as matching to *Wolbachia*. In total,  
108 there were  $\sim 7.89 \times 10^{10}$  reads across 765 libraries, so only 1 in  $\sim 150$  million reads maps to  
109 *Wolbachia* (Fig. 1). This corresponds to less than one *Wolbachia* read per sequencing library on  
110 average, and, based on a large and broad sampling, provides independent evidence for only very  
111 sporadic presence, extremely low titer, or even absence of *Wolbachia* in *A. gambiae*.

112 Contrasting with our findings, a recent *in silico* screen of archived arthropod short read libraries  
113 extracted a highly covered *Wolbachia* supergroup B genome from a sample annotated as *A.*  
114 *gambiae* (33). To understand the reasons for this discrepancy we inspected the sequencing libraries  
115 used by Pascar and Chandler (33) and discovered that they contain a mix of sequences of several  
116 other potential *Wolbachia* hosts (Fig. 2). Based on the analysis of the ITS2 and COI haplotypes of  
117 the most abundant sequences (36, 37) we conclude that the assembled *Wolbachia* genome likely  
118 originates from *Anopheles* “species A” and not *A. gambiae* (Fig. 2, Fig. S1, Supplementary File  
119 1). Our interpretation is in line with a recent discovery of a highly prevalent supergroup B  
120 *Wolbachia* strain, distinct from other supergroup B strains, in *Anopheles* “species A” (31). Our

121 phylogenomic reconstructions further support this, as they place the newly assembled *Wolbachia*  
122 genome (33) within supergroup B, but separate from most other strains of this lineage (Fig. S1C).  
123 These analyses show that unambiguous identification of *Anopheles* species is an additional  
124 difficulty in detecting *Wolbachia* infections based on the sequencing data. Therefore, the newly  
125 reported genome does not contribute to the understanding of the elusive low titer *Wolbachia*  
126 naturally associated with *A. gambiae*.

127 The putative low titer *Wolbachia* infections required improved diagnostics. This has prompted  
128 Shaw *et al.* to modify the wSpec PCR protocol by including a nested pair of primers and increasing  
129 the number of cycles to 72, potentially amplifying the initial 16S template over  $10^{21}$  times (28).  
130 The protocol was used in several subsequent studies (29–31), but proved unreliable, as Gomes *et*  
131 *al.* reported 19% of the technical replicates yielding discordant results, even when total number of  
132 cycles was increased to 80 (29). At the same time, the wSpec amplification protocol was sensitive  
133 enough to detect *Wolbachia* in a filarial nematode residing within one of the *Anopheles coustani*  
134 guts (30). Thus, this diagnostic test can detect *Wolbachia* in organisms interacting with *Anopheles*.  
135 Meanwhile, Gomes *et al.* based their work on a 40-cycle qPCR-based assay (29). The robustness  
136 of this test is not clear, as no raw data were included. Other methods routinely used to detect low  
137 titer *Wolbachia* in insects, like PCR-southern blot or amplification of repeated sequences (e.g. the  
138 transposases with the highest coverage in genomic data) were never tested on *Wolbachia*  
139 sequences found in *Anopheles* (38, 39). Amplification of other *Wolbachia* sequences from  
140 putatively infected mosquitos, including *Wolbachia* surface protein and MLST genes, has also  
141 been challenging (26, 27, 29–31), requiring protocol modifications (30) or the use of more than  
142 one mosquito sample (31), and was unsuccessful in some cases (26, 27). Overall, detection of  
143 *Wolbachia* sequences in *A. gambiae* by PCR-based methods remains challenging.

144 In summary, very little sequence data is available for the putative *Wolbachia* symbiont of *A.*  
145 *gambiae*, despite several attempts of generating and extracting such data. One common feature of  
146 all of them is an extremely low titer, at the limit of detection of PCR-based methods. Even from  
147 the little data available, it is obvious that there is no single *Wolbachia* strain associated with  
148 *Anopheles gambiae* (Fig. 3). In fact, almost every *Wolbachia* 16S amplicon and sequence  
149 attributed to *A. gambiae* is unique, and their diversity spans at least two *Wolbachia* supergroups  
150 (genetic lineages roughly equivalent to species in other bacterial genera, Fig. 3) (40). In  
151 combination, we interpret the very low titers and the conflicting phylogenetic affiliations of the  
152 sequenced strains as incompatible with the notion of a stable, intraovarially-transmitted *Wolbachia*  
153 symbiont in *A. gambiae*. However, this conclusion requires alternative explanations for the  
154 presence of *Wolbachia* DNA in these malaria mosquitos.

155

#### 156 **Origin of *Wolbachia* sequences in *Anopheles gambiae***

157 The presence of *Wolbachia* DNA in *A. gambiae* samples could be explained not only by a stable  
158 *Wolbachia-Anopheles* symbiosis but also in several alternative ways. First, the signal could stem  
159 from *Wolbachia* DNA insertion into an insect chromosome (26). Fragments of *Wolbachia*  
160 genomes are frequently found within insect genomes (41–43), and the most spectacular cases  
161 include a nearly complete genome insertion in *Drosophila ananassae* (44). This possibility was  
162 discussed by Baldini *et al.*, but as the authors point out, the presence of the sequences only in some  
163 tissues, and the very low titer argue against this hypothesis (26). The second possibility discussed  
164 by Baldini and colleagues is the insertion of *Wolbachia* fragment into the chromosome of another,  
165 so far unidentified, mosquito-associated microorganism. However, this hypothesis does not help  
166 to explain the diversity of *Wolbachia* 16S sequences found in *Anopheles*.

167 Another hypothesis explaining the presence of *Wolbachia* sequences in *Anopheles* tissues would  
168 be contamination of the mosquito surface or gut. This contamination could come from several  
169 sources. First, ectoparasitic mites or midges, and endoparasitic nematodes in *Anopheles* could  
170 contaminate whole tissue DNA extracts, as shown by the detection of the *Wolbachia* symbiont of  
171 *Dirofilaria immitis* in *Anopheles coustani* DNA preparation (30). However, the presence of  
172 unknown symbionts or parasites with novel *Wolbachia* strains is very challenging to test for.

173 The second possible source of *Wolbachia* contamination are plants. It has been shown that  
174 *Wolbachia* can persist in plants on which *Wolbachia*-infected insects feed, and then be detected in  
175 previously uninfected insects reared on the same plant (reviewed in (45)). As malaria vectors feed  
176 on plant nectar and fruits in the wild, *Wolbachia* DNA traces from these sources could accumulate  
177 in their guts. Feeding on *Wolbachia* infected food could explain *Wolbachia* 16S rDNA encounter  
178 in the ovaries, as adjacent gut can easily be perforated during dissections, releasing content and  
179 contaminating other tissues. Again, *Wolbachia* sequences from the gut could also explain detection  
180 of *Wolbachia* sequences in larvae, as eggs and larval habitats could be contaminated with adult  
181 feces.

182 Another possible source of contamination are other insects co-habiting the collection sites. *Culex*,  
183 *Aedes* and *Anopheles* species can be found in sub-Saharan Africa, and all genera include natural  
184 *Wolbachia* hosts. This route of contamination seems especially plausible for mosquito larvae,  
185 which are avid predators, attacking other water inhabiting insects. Moreover, *Wolbachia* 16S  
186 sequences can be detected in the water storage containers inhabited by larvae of various mosquito  
187 species (Supplementary File 1), and as such could also be acquired by newly emerging adults and  
188 females during egg laying (46). Unfortunately, we have no data on the water composition of the  
189 breeding sites of the putative *A. gambiae* *Wolbachia* carriers, which could explain *Wolbachia*  
190 sequences presence across the mosquito life cycle.



191 The data on natural *Wolbachia* infections in *A. gambiae*, together with similar reports suggesting  
192 *Wolbachia* infections in species previously considered uninfected, e.g. *A. stephensi* (47) , *A.*  
193 *funestus* (48) and *A. aegypti* ((47, 49, 50) but also (51, 52)), should be carefully examined, as all  
194 have aquatic, detritus-feeding and predatory larvae, while adults are terrestrial and can feed on  
195 nectar. Thus, bacteria and/or contaminating sequences could spread between these and other  
196 organisms sharing the same niches, necessitating studies designed to discern candidates for  
197 symbiotic taxa from transient and contaminating bacteria. Sampling of the mosquitoes along with  
198 their environments and co-habiting species may help to reveal the origin and nature of *Wolbachia*  
199 sequences identified in *A. gambiae*.

200 Importantly, the contamination from any of the mentioned sources cannot be ruled out with the  
201 data currently available. The previously mentioned sequencing of two *Wolbachia*-positive ovary  
202 samples resulted in 571 (out of ~800,000,000) reads classified as *Wolbachia* (0.000063%) (26).  
203 For a highly sensitive sequencing technique such as Illumina sequencing, this falls well within the  
204 expected coverage of contaminants. Deep shotgun sequencing of eukaryotes usually results in  
205 some non-target sequences from environmental contaminants, and it is unlikely that the *A. gambiae*  
206 libraries are an exception (53–55). Contamination stemming from non-target microbial taxa is  
207 especially problematic in low biomass samples (56), such as single mosquito ovaries. Adding to  
208 the difficulty, all of the studies reporting *Wolbachia* from amplicon or metagenomic sequencing  
209 do not present negative controls (e.g. sequencing of extraction or blank controls, quantification of  
210 microbial taxa, sequencing of mock communities (26, 27, 29–31)). This is not to say that the  
211 *Wolbachia* sequences definitely constitute contaminants, but they are simply not discernible from  
212 such. In general, the detection of very low titer *Wolbachia* through highly sensitive methods  
213 (nested PCRs, Illumina sequencing) alone is not sufficient to conclude that an intracellular,  
214 inherited symbiont is present in a sample.

215 **Expected features of natural *Wolbachia* from *Anopheles gambiae***

216 While sequence data alone are insufficient to determine if *Wolbachia* is a symbiont of *Anopheles*  
217 *gambiae*, and assembly of complete genomes has not been achieved due to low sequence  
218 abundance, other hallmarks of symbiotic interactions between the taxa can be used to support this  
219 claim.

220 First, intracellular localization is imperative for *Wolbachia*. The only published image of natural  
221 *Wolbachia* infections from *A. gambiae* is an indirect fluorescence *in situ* hybridization, using Cy3-  
222 labelled probe, anti-Cy3 mouse antibody, and anti-mouse Alexa448 secondary antibody (see Fig.  
223 1 in Ref (28)). The probe was designed to hybridize within, by then, the only PCR-detectable  
224 *Wolbachia* sequence - the wSpec amplicon region. However, the low resolution of the image and  
225 the lack of host membrane staining do not allow to confirm the wSpec intracellular localization  
226 (28). Electron microscopy showing an immunogold-labelled *Wolbachia*, or a high-resolution FISH  
227 combined with a membrane staining would provide unequivocal visual evidence for the existence  
228 of intracellular *Wolbachia* infections in *A. gambiae*.

229 Second, *Wolbachia*'s intracellular lifestyle is directly related to its mode of transmission, which is  
230 expected to occur from mother to offspring within the mother's ovaries. In the first study on natural  
231 *Wolbachia* in *A. gambiae*, maternal transmission of the detected wSpec sequences was also  
232 examined. In this experiment, five wSpec-positive wild-collected gravid females oviposited in the  
233 lab and their larval progeny was tested for wSpec amplification (detected in 56% to 100% of the  
234 offspring) (26). However, intraovarial transmission of *Wolbachia* was never explicitly addressed.  
235 Surface sterilization of eggs after oviposition would help to determine the transmission mode of  
236 these sequences, just as testing for and excluding horizontal (between larvae or adult to larvae)  
237 and paternal wSpec sequence transmission. These experiments would help to confirm that *A.*

238 *gambiae* is infected with an intracellular, transovarially transmitted symbiont and, together with  
239 the PCR evidence, diagnose a stable *Wolbachia* infection.

240

#### 241 ***Wolbachia* symbionts of *Anopheles gambiae* and malaria**

242 *Wolbachia* phenotypes similar to those observed in other insect hosts could have a huge impact on  
243 wild *Anopheles* populations and malaria transmission. Reproductive manipulations and fitness  
244 benefits could increase the proportion of biting females spreading the disease, while pathogen  
245 blocking could limit *Plasmodium* prevalence in the wild mosquito populations. Understanding  
246 *Anopheles gambiae* biology is crucial for the design of effective strategies aiming at limiting  
247 *Plasmodium* transmission.

248 Targeted *Wolbachia*-based *Plasmodium* control strategies, similar to the ones used for dengue and  
249 Zika virus control, are another exciting prospect. However, they are not reliant on *Wolbachia*  
250 symbionts naturally associated with *Anopheles*. Insect populations could equally well be  
251 suppressed by the release of males carrying incompatible *Wolbachia* strains by bidirectional CI on  
252 infected population or by unidirectional CI on an uninfected one. The same applies to *Wolbachia*-  
253 induced pathogen blocking. Existing initiatives to control dengue and Zika virus with *Wolbachia*-  
254 conferred antiviral protection use naturally uninfected *Aedes aegypti* mosquitos that were  
255 artificially transinfected with *Wolbachia* from a different insect species (12). These mosquitos  
256 benefit not only from protection by the core and yet unknown mechanism, but also from immune  
257 system upregulation caused by a recent transinfection with *Wolbachia* (10). Thus, the *Wolbachia*-  
258 based population suppression and disease blocking can work in species not commonly infected  
259 with *Wolbachia* in the wild.

260 The presence and, subsequently, *Plasmodium* blocking properties of the presumed natural  
261 *Wolbachia* strains in *A. gambiae* remain to be confirmed. Given that *Wolbachia* detection in *A.*  
262 *gambiae* remains challenging (with PCR-based replicate experiments yielding discordant results  
263 (29)), it was surprising that two studies have reported negative correlations between the low titer  
264 *Wolbachia* sequences and *Plasmodium* (28, 29). As pathogen protection has been shown to depend  
265 on the symbiont titer (57–59) and has so far only been detected in strains exhibiting relatively high  
266 bacterial load, it is likely to be absent in *A. gambiae* (31). Moreover, CI necessary for the spread  
267 of *Wolbachia* in artificially infected vector populations was also not detected (28). Reliable  
268 protocols for the detection of *Wolbachia* in *A. gambiae*, together with independent repetition  
269 efforts seem necessary to characterize the potential of the putative *A. gambiae* symbionts for their  
270 deployment in vector or disease control programs.

271 In summary, although using *Wolbachia* to fight malaria has been eagerly anticipated, naturally  
272 occurring *Wolbachia* strains in *Anopheles* were never an absolute requirement for this to be  
273 successful. Even now, their presence, phenotypes and suitability for deployment in disease control  
274 remain to be confirmed. However, they should be studied, as understanding *Anopheles gambiae*  
275 biology and ecology, including its interactions with other micro- and macroscopic organisms, is  
276 crucial for designing effective malaria elimination programs.

277

## 278 **Conclusions**

279 The evidence for natural *Wolbachia* infections in *Anopheles gambiae* is currently limited to a small  
280 number of highly diverse, very low titer DNA sequences detected in this important malaria vector.  
281 Further efforts towards characterization of the interaction between *Wolbachia* sequences and *A.*  
282 *gambiae* are required to establish that this is a true symbiotic association. Demonstrating the  
283 presence of intracellular bacterial cells and their intraovarian transmission are prerequisites to

284 diagnose a symbiosis. Additionally, genomic data could shed light on the features of these  
285 *Wolbachia* and may reveal the origin of the sequences and the ecological interactions that caused  
286 their acquisition by *A. gambiae* mosquitos. Finally, ascertaining phenotypes associated with these  
287 *Wolbachia* sequence variants will improve our understanding of *Anopheles gambiae* biology, and  
288 as such inform future strategies aimed at limiting malaria spread and eventual disease eradication.

289 The fact that *Wolbachia* sequences were encountered multiple times by independent groups of  
290 researchers clearly indicates present or past, direct or indirect ecological interaction between  
291 *Wolbachia* and *Anopheles gambiae* across Africa. While in-depth investigations of these  
292 interactions will be interesting from a basic biology, evolutionary, ecological and disease control  
293 perspective, current data indicate that the postulated natural *Wolbachia* infections in *Anopheles*  
294 will be of limited use for application in fighting malaria with *Wolbachia*.

295

296

## 297 **Acknowledgements**

298 We thank Francis Jiggins for a suggestion on using the *Anopheles gambiae* 1000 genomes project  
299 data and for the critical reading and helpful comments on the manuscript. We also thank Elena  
300 Levashina and Elves Heleno Duarte for comments on the draft of this work.

301 EC was supported by EMBO Long-Term Fellowship (EMBO ALTF 1497-2015), co-funded by  
302 Marie Curie Actions by the European Commission (LTFCOFUND2013, GA-2013-609409) and  
303 FEBS Long Term Fellowship. MG was supported by a Marie Curie Fellowship of the European  
304 Commission (H2020-MSCA-IF-2015, 703379).

305

306 **Bibliography**

- 307 1. Weinert LA, Araujo-Jnr E V., Ahmed MZ, Welch JJ (2015) The incidence of bacterial  
308 endosymbionts in terrestrial arthropods. *Proc R Soc B Biol Sci* 282(1807):20150249–  
309 20150249.
- 310 2. Werren JH, Baldo L, Clark ME (2008) Wolbachia: master manipulators of invertebrate  
311 biology. *Nat Rev Microbiol* 6(10):741–51.
- 312 3. Yen JH, Barr ARR (1973) The etiological agent of cytoplasmic incompatibility in *Culex*  
313 *pipiens*. *J Invertebr Pathol* 22(2):242–250.
- 314 4. Dobson SL, Fox CW, Jiggins FM (2002) The effect of Wolbachia-induced cytoplasmic  
315 incompatibility on host population size in natural and manipulated systems. *Proc Biol Sci*  
316 269(1490):437–45.
- 317 5. Laven H (1967) Eradication of *Culex pipiens fatigans* through cytoplasmic  
318 incompatibility. *Nature* 216:383–384.
- 319 6. Hosokawa T, Koga R, Kikuchi Y, Meng X-Y, Fukatsu T (2010) Wolbachia as a  
320 bacteriocyte-associated nutritional mutualist. *Proc Natl Acad Sci U S A* 107(2):769–74.
- 321 7. Fast EM, et al. (2011) Wolbachia enhance *Drosophila* stem cell proliferation and target  
322 the germline stem cell niche. *Science* 334(6058):990–2.
- 323 8. Teixeira L, Ferreira A, Ashburner M (2008) The bacterial symbiont Wolbachia induces  
324 resistance to RNA viral infections in *Drosophila melanogaster*. *PLoS Biol*  
325 6(12):e1000002.
- 326 9. Hedges LM, Brownlie JC, O’Neill SL, Johnson KN (2008) Wolbachia and virus  
327 protection in insects. *Science* 322(5902):702.

- 328 10. Moreira LA, et al. (2009) A Wolbachia symbiont in *Aedes aegypti* limits infection with  
329 dengue, Chikungunya, and Plasmodium. *Cell* 139(7):1268–78.
- 330 11. O’Neill SL (2018) The Use of Wolbachia by the World Mosquito Program to Interrupt  
331 Transmission of *Aedes aegypti* Transmitted Viruses. *Dengue and Zika: Control and*  
332 *Antiviral Treatment Strategies* (Springer Link), pp 355–360.
- 333 12. Walker T, et al. (2011) The wMel Wolbachia strain blocks dengue and invades caged  
334 *Aedes aegypti* populations. *Nature* 476(7361):450–3.
- 335 13. Frentiu FD, et al. (2014) Limited dengue virus replication in field-collected *Aedes aegypti*  
336 mosquitoes infected with Wolbachia. *PLoS Negl Trop Dis* 8(2):e2688.
- 337 14. Hoffmann AA, et al. (2014) Stability of the wMel Wolbachia Infection following invasion  
338 into *Aedes aegypti* populations. *PLoS Negl Trop Dis* 8(9):e3115.
- 339 15. O’Neill SL, et al. (2018) Scaled deployment of Wolbachia to protect the community from  
340 *Aedes* transmitted arboviruses. *Gates Open Res* 2(36).  
341 doi:10.12688/gatesopenres.12844.1.
- 342 16. World Health Organization (2015) *World Malaria Report*.
- 343 17. Kambris Z, et al. (2010) Wolbachia stimulates immune gene expression and inhibits  
344 plasmodium development in *Anopheles gambiae*. *PLoS Pathog* 6(10):e1001143.
- 345 18. Ricci I, Cancrini G, Gabrielli S, D’Amelio S, Favia G (2002) Searching for Wolbachia  
346 (Rickettsiales:Rickettsiaceae) in Mosquitoes (Diptera: Culicidae): Large Polymerase  
347 Chain Reaction Survey and New Identifications. *J Med Entomol* 39(4):562–567.
- 348 19. Kittayapong P, Baisley KJ, Baimai V, O’Neill SL (2000) Distribution and diversity of  
349 Wolbachia infections in Southeast Asian mosquitoes (Diptera: Culicidae). *J Med Entomol*

- 350 37(3):340–345.
- 351 20. Rasgon JL, Scott TW (2004) An initial survey for Wolbachia (Rickettsiales:  
352 Rickettsiaceae) infections in selected California mosquitoes (Diptera: Culicidae). *J Med*  
353 *Entomol* 41(2):255–257.
- 354 21. Rasgon JL, Ren X, Petridis M (2006) Can *Anopheles gambiae* be infected with Wolbachia  
355 pipientis? Insights from an in Vitro System. *Appl Environ Microbiol* 72(12):7718–7722.
- 356 22. Jin C, Ren X, Rasgon JL (2009) The virulent Wolbachia strain wMelPop efficiently  
357 establishes somatic infections in the malaria vector *Anopheles gambiae*. *Appl Environ*  
358 *Microbiol* 75(10):3373–3376.
- 359 23. Hughes GL, Koga R, Xue P, Fukatsu T, Rasgon JL (2011) Wolbachia infections are  
360 virulent and inhibit the human malaria parasite *Plasmodium falciparum* in *Anopheles*  
361 *gambiae*. *PLoS Pathog* 7(5):e1002043.
- 362 24. Bian G, et al. (2013) Wolbachia invades *Anopheles stephensi* populations and induces  
363 refractoriness to *Plasmodium* infection. *Science* 340(6133):748–51.
- 364 25. Hughes GL, et al. (2014) Native microbiome impedes vertical transmission of Wolbachia  
365 in *Anopheles* mosquitoes. *Proc Natl Acad Sci U S A* 111(34):12498–503.
- 366 26. Baldini F, et al. (2014) Evidence of natural Wolbachia infections in field populations of  
367 *Anopheles gambiae*. *Nat Commun* 5:3985.
- 368 27. Buck M, et al. (2016) Bacterial associations reveal spatial population dynamics in  
369 *Anopheles gambiae* mosquitoes. *Sci Rep* 6(February):22806.
- 370 28. Shaw WR, et al. (2016) Wolbachia infections in natural *Anopheles* populations affect egg  
371 laying and negatively correlate with *Plasmodium* development. *Nat Commun*



- 372 7(May):11772.
- 373 29. Gomes FM, et al. (2017) Effect of naturally occurring Wolbachia in *Anopheles gambiae*  
374 s.l. mosquitoes from Mali on *Plasmodium falciparum* malaria transmission. *Proc Natl*  
375 *Acad Sci* 114(47):12566–12571.
- 376 30. Ayala D, et al. (2018) Natural Wolbachia infections are common in the major malaria  
377 vectors in Central Africa. *bioRxiv*. Available at:  
378 <http://biorxiv.org/content/early/2018/06/11/343715.abstract>.
- 379 31. Jeffries CL, et al. (2018) Novel Wolbachia strains in *Anopheles* malaria vectors from Sub-  
380 Saharan Africa. *Wellcome Open Res* 3:113.
- 381 32. Consortium TA *gambiae* 1000 G (2015) Ag1000G phase 1 AR3 data release.  
382 MalariaGEN. Available at: <http://www.malariagen.net/data/ag1000g-phase1-AR3>.
- 383 33. Pascar J, Chandler CH (2018) A bioinformatics approach to identifying Wolbachia  
384 infections in arthropods. *PeerJ* 6:e5486.
- 385 34. Werren JH, Windsor DM (2000) Wolbachia infection frequencies in insects: evidence of a  
386 global equilibrium? *Proc Biol Sci* 267:1277–1285.
- 387 35. Richardson MF, et al. (2012) Population Genomics of the Wolbachia Endosymbiont in  
388 *Drosophila melanogaster*. *PLoS Genet* 8(12):e1003129.
- 389 36. Lobo NF, et al. (2015) Unexpected diversity of *Anopheles* species in Eastern Zambia:  
390 Implications for evaluating vector behavior and interventions using molecular tools. *Sci*  
391 *Rep* 5:17952.
- 392 37. Stevenson JC, Norris DE (2017) Implicating cryptic and novel anophelines as malaria  
393 vectors in Africa. *Insects* 8(1):1.

- 394 38. Schneider DI, Klasson L, Lind AE, Miller WJ (2014) More than fishing in the dark: PCR  
395 of a dispersed sequence produces simple but ultrasensitive *Wolbachia* detection. *BMC*  
396 *Microbiol* 14(1):121.
- 397 39. Arthofer W, et al. (2009) Hidden *Wolbachia* diversity in field populations of the European  
398 cherry fruit fly, *Rhagoletis cerasi* (Diptera, Tephritidae). *Mol Ecol* 18(18):3816–3830.
- 399 40. Chung M, Munro JB, Tettelin H, Dunning Hotopp JC (2018) Using Core Genome  
400 Alignments To Assign Bacterial Species. *mSystems* 3(6). doi:10.1128/mSystems.00236-  
401 18.
- 402 41. Nikoh N, et al. (2008) *Wolbachia* genome integrated in an insect chromosome: evolution  
403 and fate of laterally transferred endosymbiont genes. *Genome Res* 18(2):272–80.
- 404 42. Kondo N, Nikoh N, Ijichi N, Shimada M, Fukatsu T (2002) Genome fragment of  
405 *Wolbachia* endosymbiont transferred to X chromosome of host insect. *Proc Natl Acad Sci*  
406 99(22):14280–14285.
- 407 43. Klasson L, Kambris Z, Cook PE, Walker T, Sinkins SP (2009) Horizontal gene transfer  
408 between *Wolbachia* and the mosquito *Aedes aegypti*. *BMC Genomics* 10:33.
- 409 44. Dunning Hotopp JC, et al. (2007) Widespread lateral gene transfer from intracellular  
410 bacteria to multicellular eukaryotes. *Science (80- )* 317(5845):1753–1756.
- 411 45. Chrostek E, Pelz-Stelinski K, Hurst GDD, Hughes GL (2017) Horizontal Transmission of  
412 Intracellular Insect Symbionts via Plants. *Front Microbiol* 8(NOV):2237.
- 413 46. Nilsson LKJ, Sharma A, Bhatnagar RK, Bertilsson S, Terenius O (2018) Presence of  
414 *Aedes* and *Anopheles* mosquito larvae is correlated to bacteria found in domestic water-  
415 storage containers. *FEMS Microbiol Ecol* 94(6). doi:10.1093/femsec/fiy058.

- 416 47. Soni M, Bhattacharya C, Sharma J, Khan SA, Dutta P (2017) Molecular typing and  
417 phylogeny of Wolbachia: A study from Assam, North-Eastern part of India. *Acta Trop*  
418 176:421–426.
- 419 48. Niang EHA, et al. (2018) First report of natural Wolbachia infection in wild Anopheles  
420 funestus population in Senegal. *Malar J* 17(1):408.
- 421 49. Coon KL, Brown MR, Strand MR (2016) Mosquitoes host communities of bacteria that  
422 are essential for development but vary greatly between local habitats. *Mol Ecol*  
423 25(22):5806–5826.
- 424 50. Carvajal T, Hashimoto K, Harnandika RK, Amalin D, Watanabe K (2018) Detection of  
425 Wolbachia in field-collected mosquito vector, *Aedes aegypti*. *bioRxiv*. Available at:  
426 <http://biorxiv.org/content/early/2018/09/08/408856.abstract>.
- 427 51. Gloria-Soria A, Chiodo TG, Powell JR (2018) Lack of Evidence for Natural Wolbachia  
428 Infections in *Aedes aegypti* (Diptera: Culicidae). *J Med Entomol* 55(5):1354–1356.
- 429 52. Hegde S, et al. (2018) Microbiome Interaction Networks and Community Structure From  
430 Laboratory-Reared and Field-Collected *Aedes aegypti*, *Aedes albopictus*, and *Culex*  
431 *quinquefasciatus* Mosquito Vectors. *Front Microbiol* 9. doi:10.3389/fmicb.2018.02160.
- 432 53. Gerth M, Hurst GDD (2017) Short reads from honey bee (*Apis* sp.) sequencing projects  
433 reflect microbial associate diversity. *PeerJ*. doi:10.7717/peerj.3529.
- 434 54. Salter SJ, et al. (2014) Reagent and laboratory contamination can critically impact  
435 sequence-based microbiome analyses. *BMC Biol* 12:87.
- 436 55. Lusk RW (2014) Diverse and widespread contamination evident in the unmapped depths  
437 of high throughput sequencing data. *PLoS One* 9(10):e110808.

- 438 56. de Goffau MC, et al. (2018) Recognizing the reagent microbiome. *Nat Microbiol* 3:851–  
439 853.
- 440 57. Chrostek E, et al. (2013) Wolbachia variants induce differential protection to viruses in  
441 *Drosophila melanogaster*: a phenotypic and phylogenomic analysis. *PLoS Genet*  
442 9(12):e1003896.
- 443 58. Osborne SE, Iturbe-Ormaetxe I, Brownlie JC, O’Neill SL, Johnson KN (2012) Antiviral  
444 protection and the importance of Wolbachia density and tissue tropism in *Drosophila*  
445 *simulans*. *Appl Environ Microbiol* 78(19):6922–9.
- 446 59. Martinez J, et al. (2014) Symbionts commonly provide broad spectrum resistance to  
447 viruses in insects: a comparative analysis of Wolbachia strains. *PLoS Pathog*  
448 10(9):e1004369.
- 449 60. Nguyen LT, Schmidt HA, Von Haeseler A, Minh BQ (2015) IQ-TREE: A fast and  
450 effective stochastic algorithm for estimating maximum-likelihood phylogenies. *Mol Biol*  
451 *Evol* 32(1):268–74.
- 452
- 453
- 454
- 455
- 456
- 457
- 458
- 459

460 **Figure legends**

461 **Figure 1 | Taxonomic composition of the reads generated in the phase 1 of the Ag1000G**  
462 **project.** In total, around 79 billion reads were generated from 765 *A. gambiae* mosquitos (32).  
463 Around 80% of these reads map to the *A. gambiae* host genome (represented by blue squares on  
464 the left). Panels on the right represent sequential magnifications of the portion of non-*Anopheles*  
465 reads, to visualize the proportion of reads mapping to *Wolbachia*.

466 **Figure 2 | Taxonomic classification of reads in the libraries from which the genome of a putative**  
467 *Wolbachia* symbiont of *A. gambiae* was assembled (BioSample SAMEA3911293). For more  
468 details, refer to Supplementary File 1 and Fig. S1.

469 **Figure 3 | Phylogenetic placement of *Wolbachia* sequences from *Anopheles gambiae* based on**  
470 16S rRNA sequences. Alignment was done with Mafft using the '--auto' option. Maximum  
471 likelihood tree was inferred with automatic model selection in IQ-TREE version 1.62 (60). Origin  
472 of sequences is indicated by colors (see legend), and tip names correspond to NCBI  
473 accession numbers. All other sequences are reference *Wolbachia* strains. Tentative supergroup  
474 affiliations are denoted with capital letters. Please note that the two *Wolbachia* 16S sequences  
475 determined by Gomes *et al.* are overlapping. Because the 117 bp overlap region is 100% identical  
476 between these two sequences we have merged them prior to phylogenetic analysis.

477

478 **Supplementary figure legend**

479 **Figure S1 | Phylogenetic assessment of SAMEA3911293 taxonomic composition. A)**  
480 Phylogenetic reconstruction of *Anopheles* species based on ITS2 alignment of previously  
481 published data and all ITS2 contigs present in the meta-assembly of all libraries from  
482 SAMEA3911293. Sequences recovered from this library are highlighted in blue. B) Phylogenetic  
483 reconstruction of *Anopheles* based on mitochondrial COI. Sequences from the SAMEA3911293  
484 meta-assembly are highlighted in blue. C) Phylogeny of *Wolbachia* supergroup B based on

485 concatenated core genome alignments of all strains with a (draft) genome in NCBI. Again, the  
486 strain isolated from SAMEA3911293 is highlighted in blue.

**~79G  
reads in  
Ag1000G  
phase1**

- *A. gambiae*
- *Wolbachia*
- Other hits

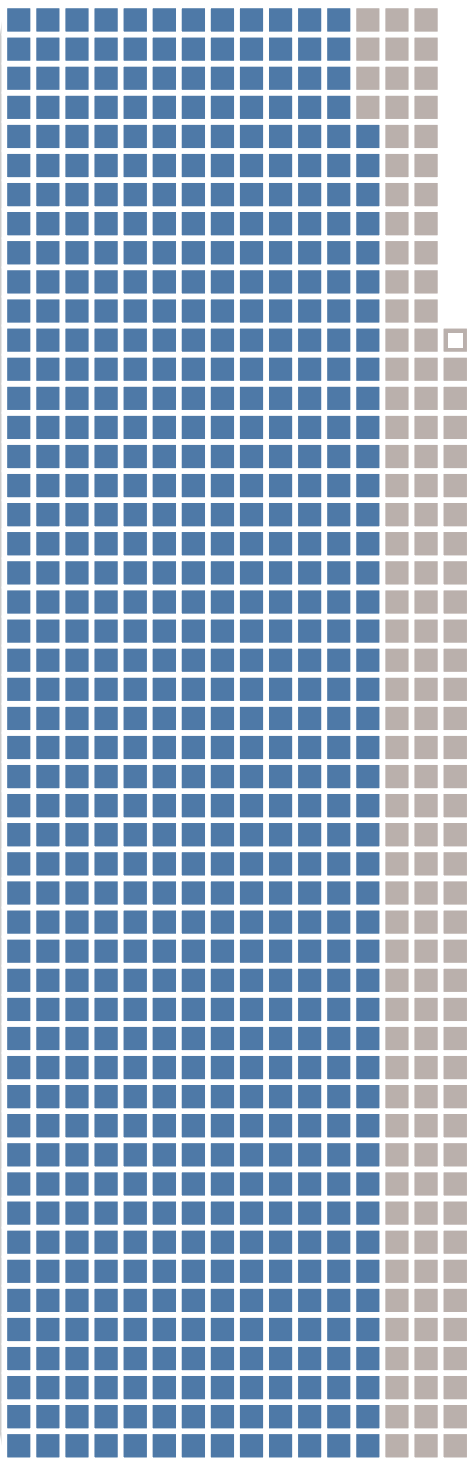

**100M  
reads**

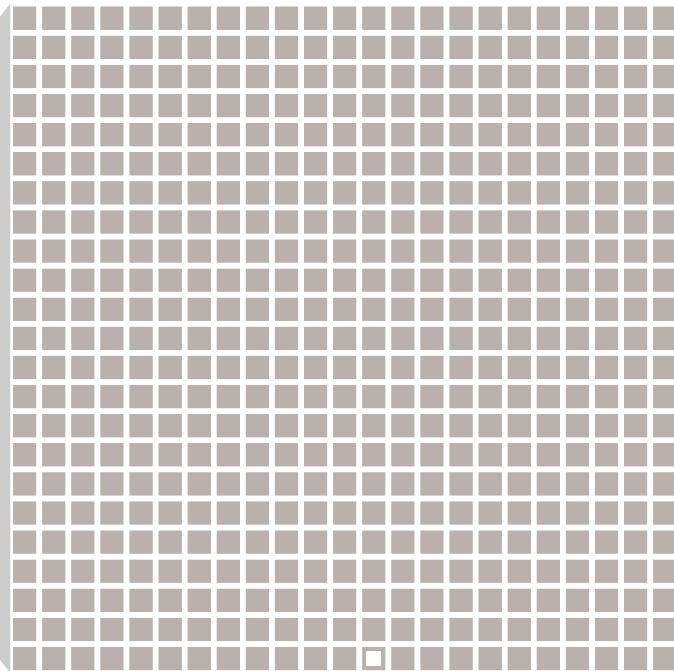

**200k  
reads**

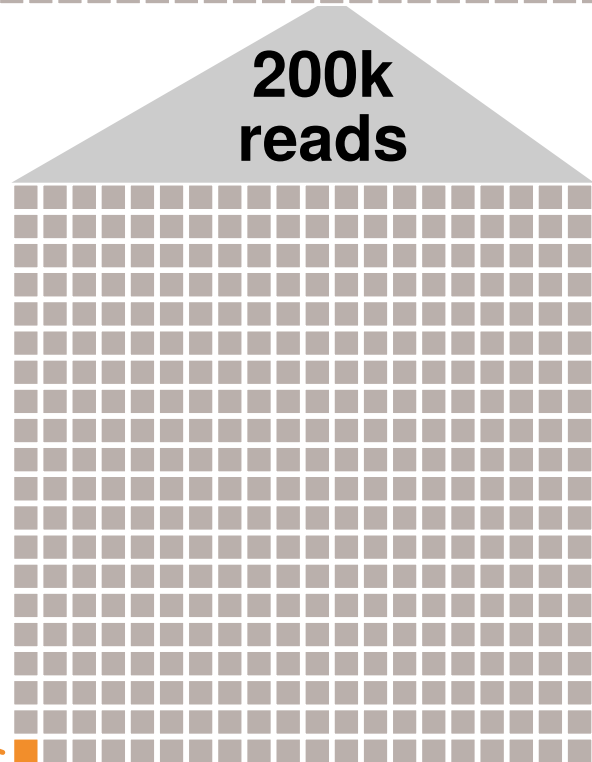

**~500  
reads**

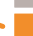

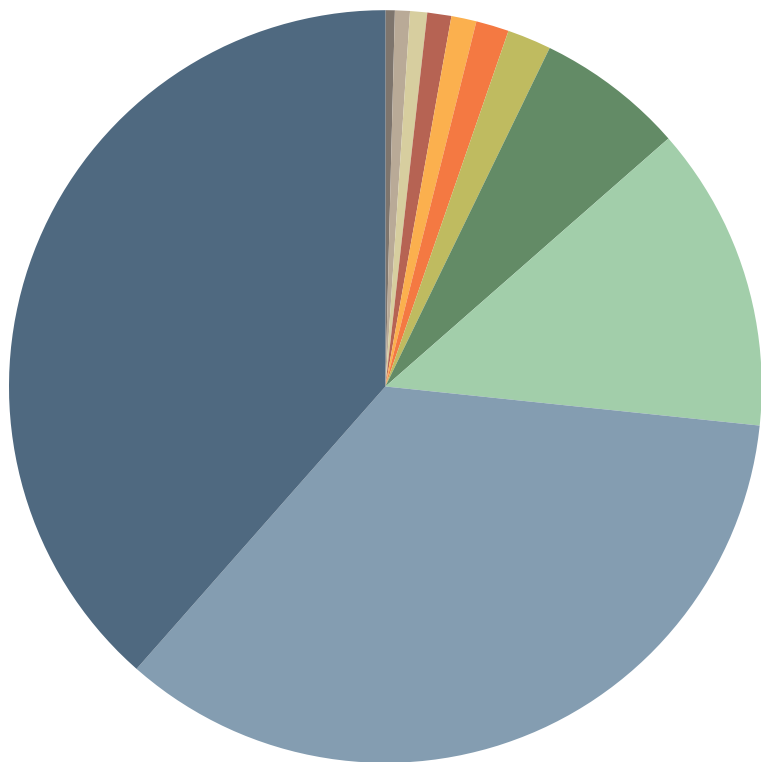

- Anopheles gambiae* PEST AgamP4
- Anopheles* (other)
- Ovis*
- Bos*
- Wuchereria*
- Other hits
- Wolbachia*
- Gongylonema*
- Babesia*
- Aedes*
- Culex*



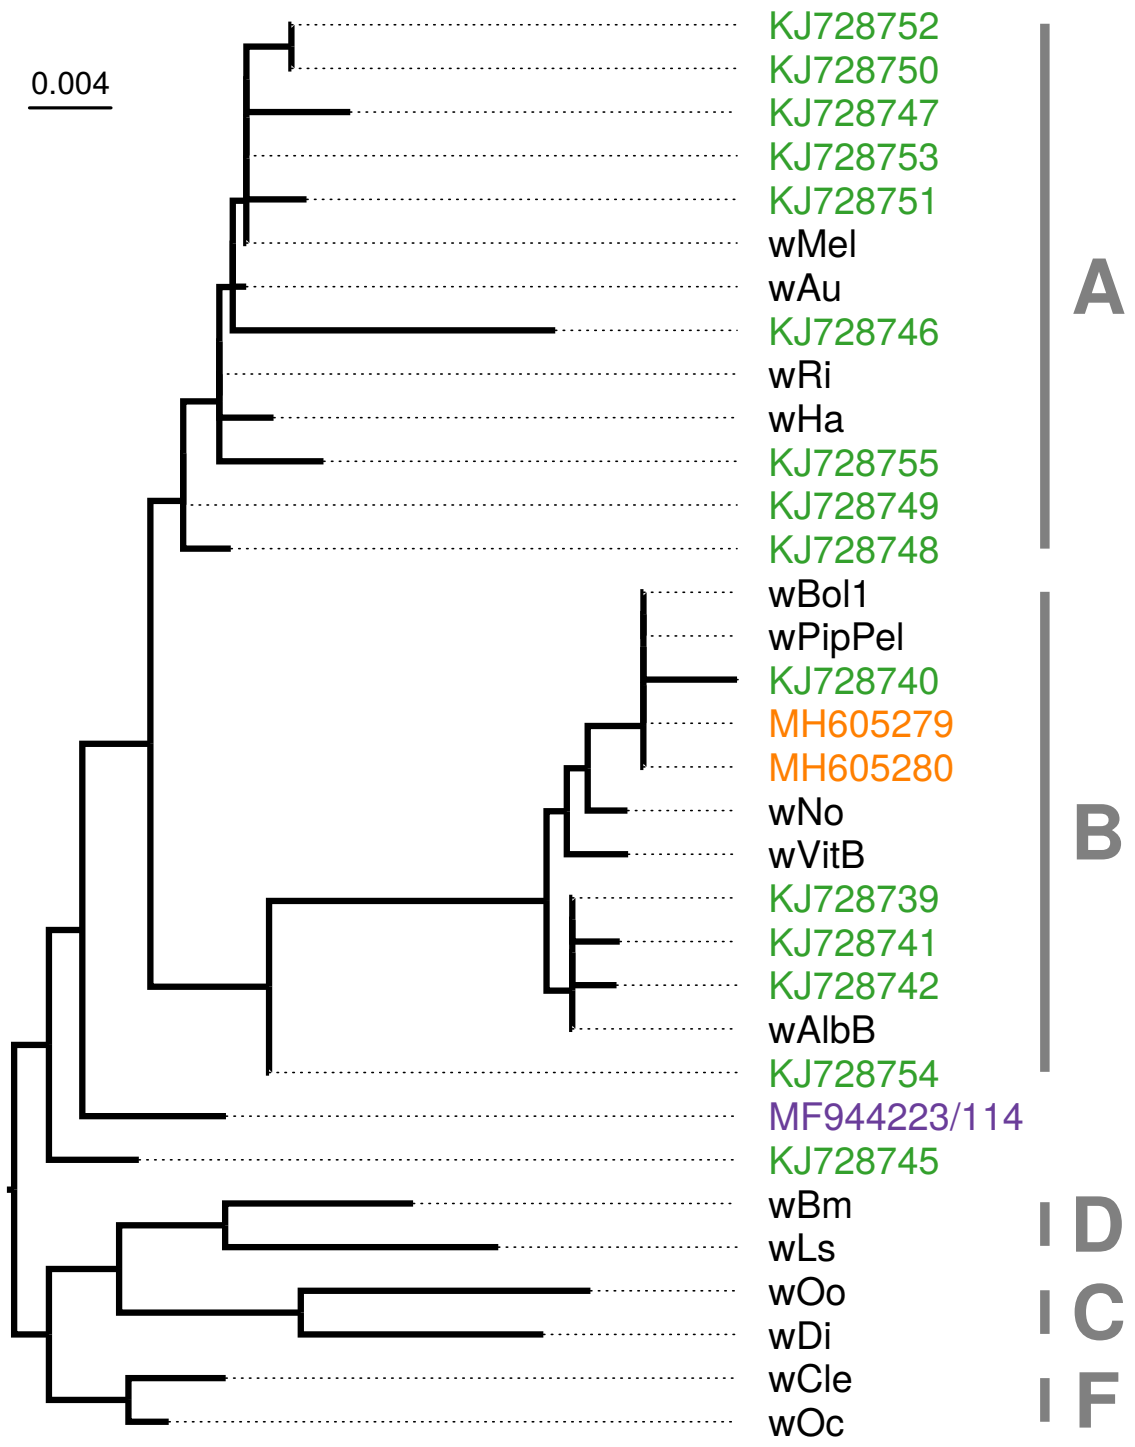

■ Baldini *et al.* (2014)  
 ■ Gomes *et al.* (2017)  
 ■ Jeffries *et al.* (2018)
